# Supplementary material for: A Proposal for a Consolidated Structural Model of the CagY Protein of Helicobacter pylori
Source: Preprints.org preprint supplement (doi:10.20944/preprints202310.1146.v1), 2023-10-18
Supplement: Supplementary file 1 [file Figure 1S.docx]

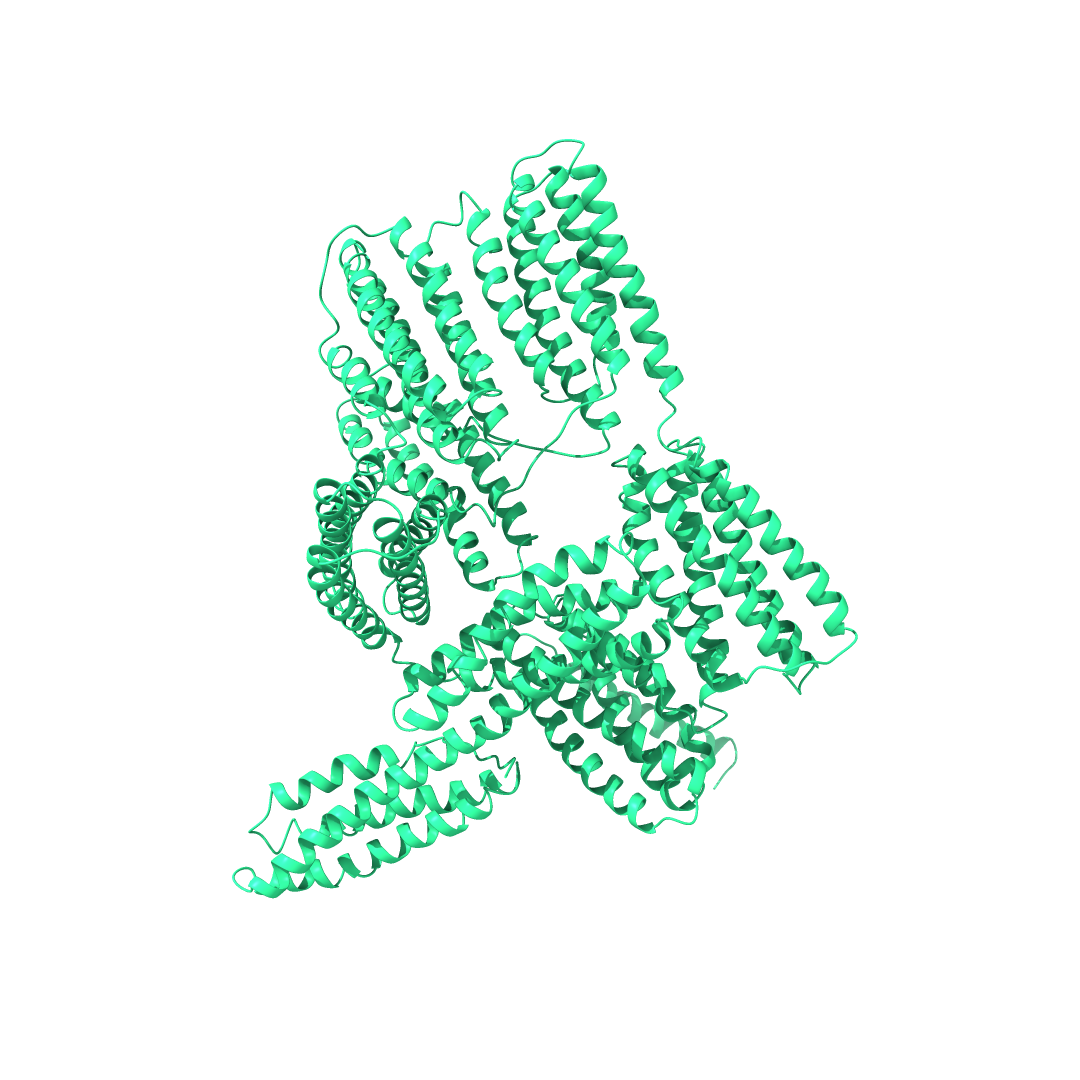

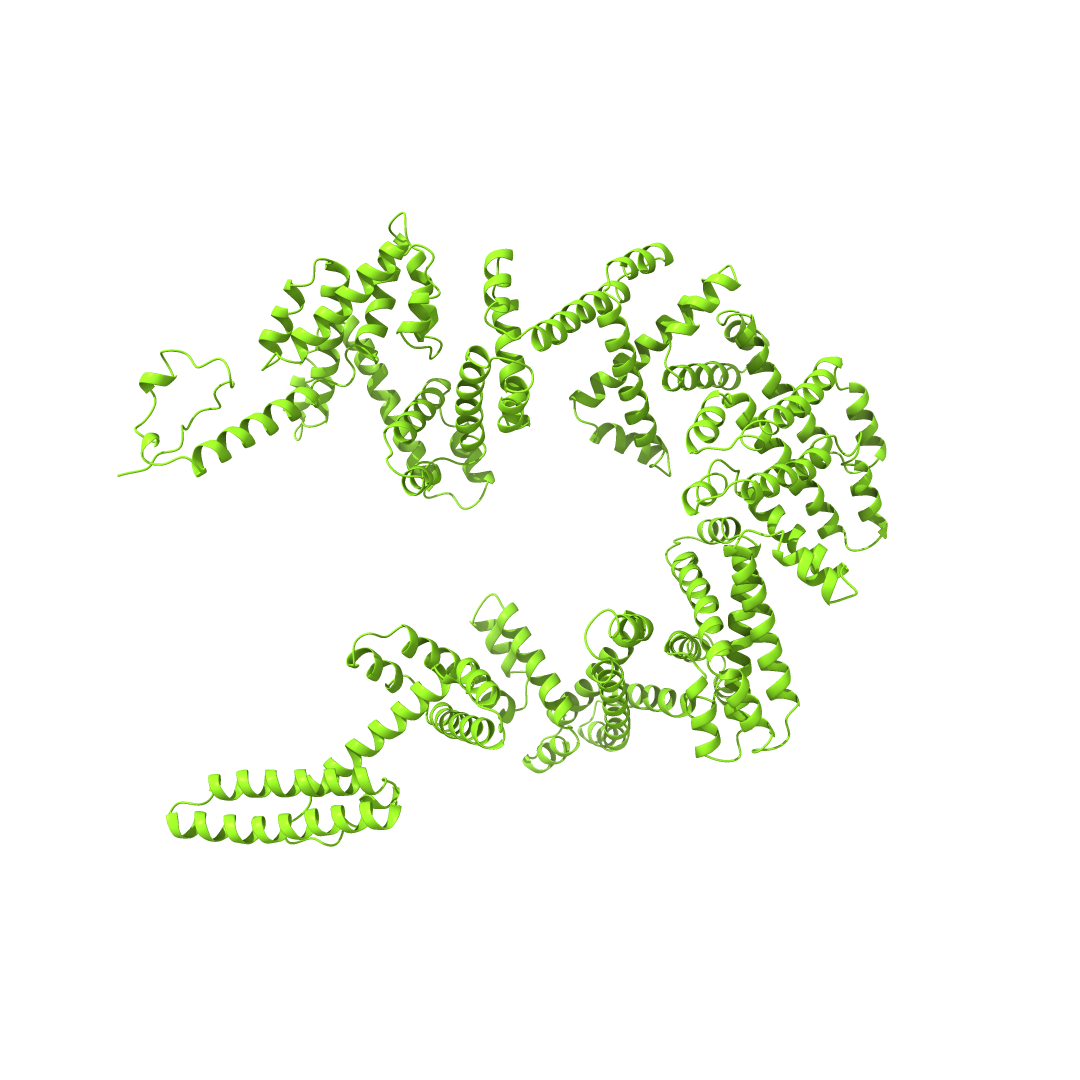


b)

a)

**Figure 1S. Structure prediction of CagY MRR for ab initio models. a) Best model calculated by I-Tasser server. b) Best model computed by Robetta server (AB method).**
