# Supplementary material for: A Proposal for a Consolidated Structural Model of the CagY Protein of Helicobacter pylori
Source: Preprints.org preprint supplement (doi:10.20944/preprints202310.1146.v1), 2023-10-18
Supplement: Supplementary file 2 [file Figure 2S.docx]

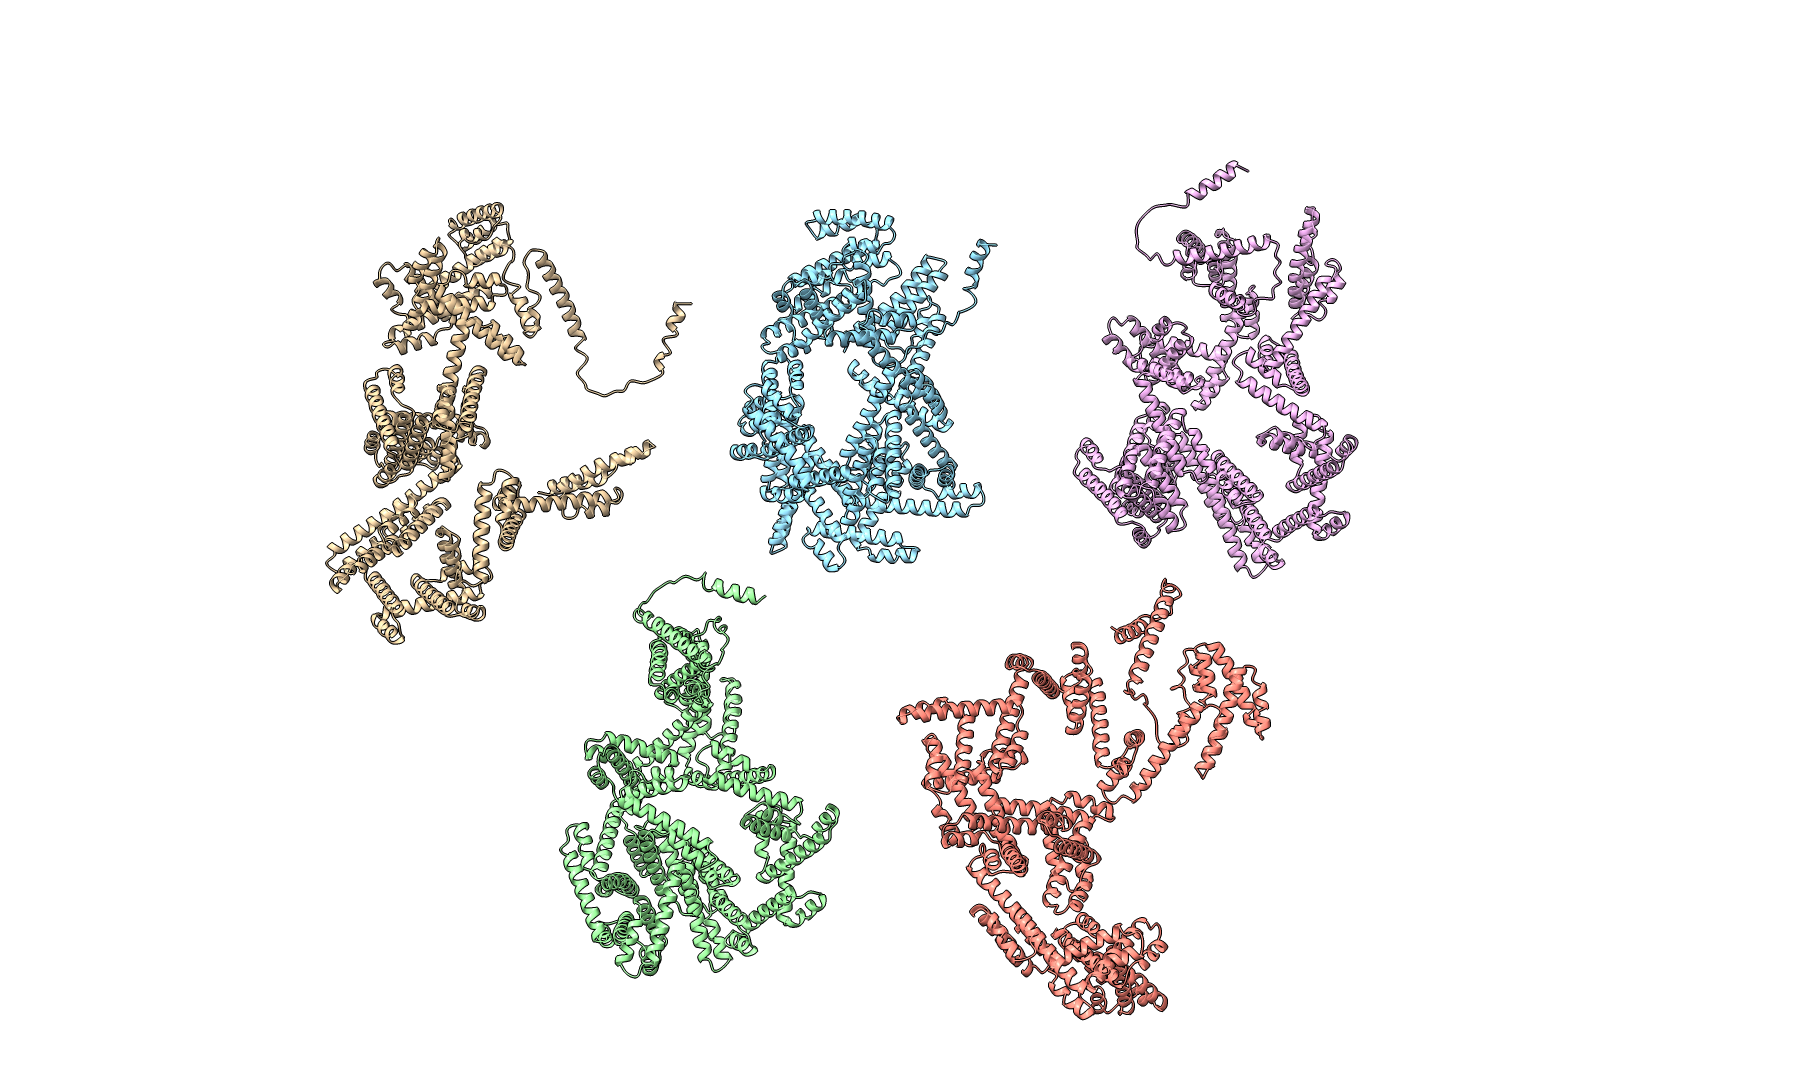

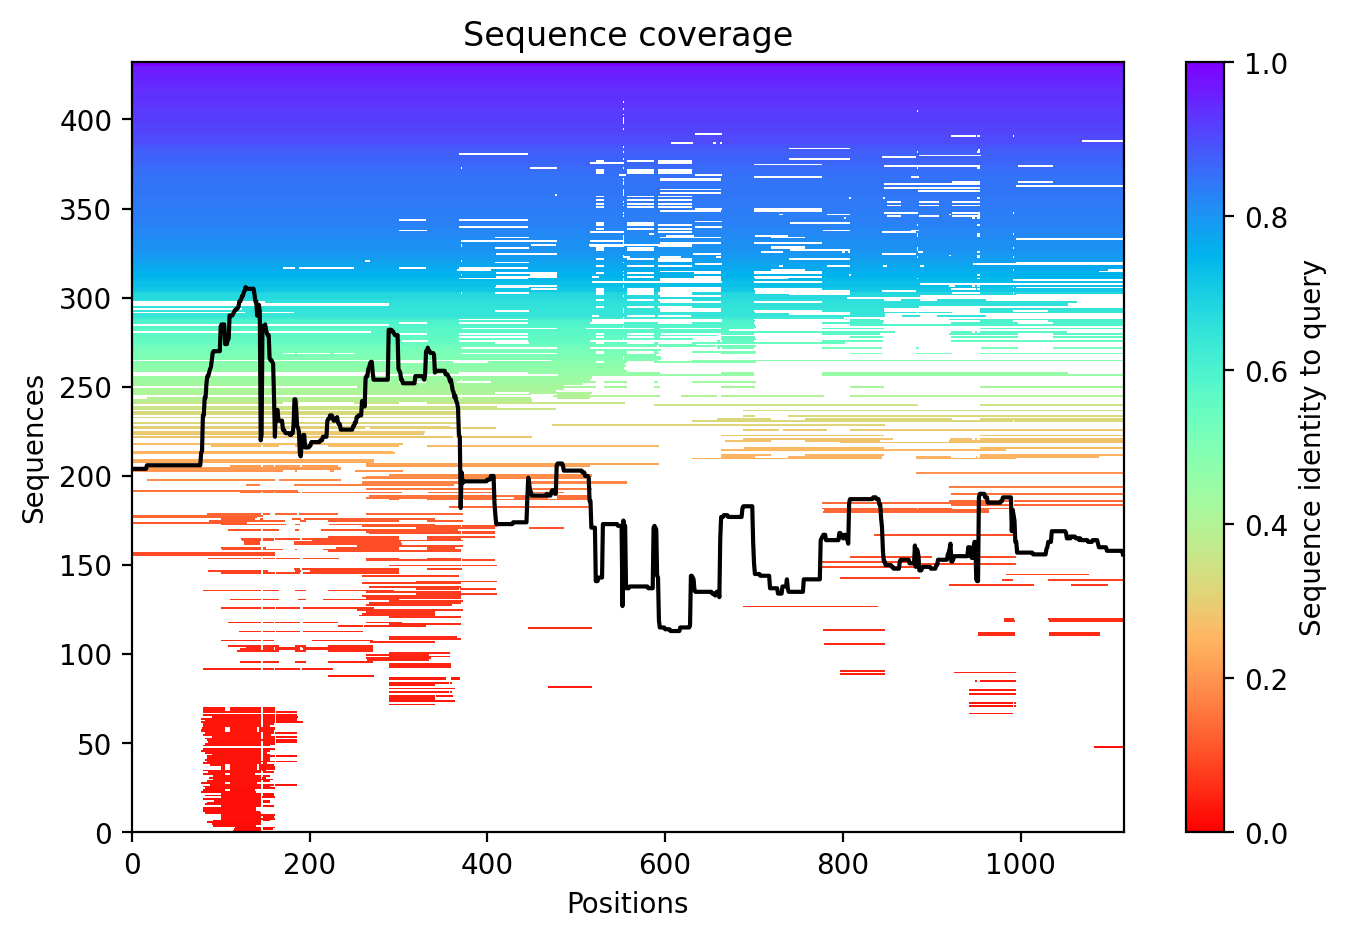

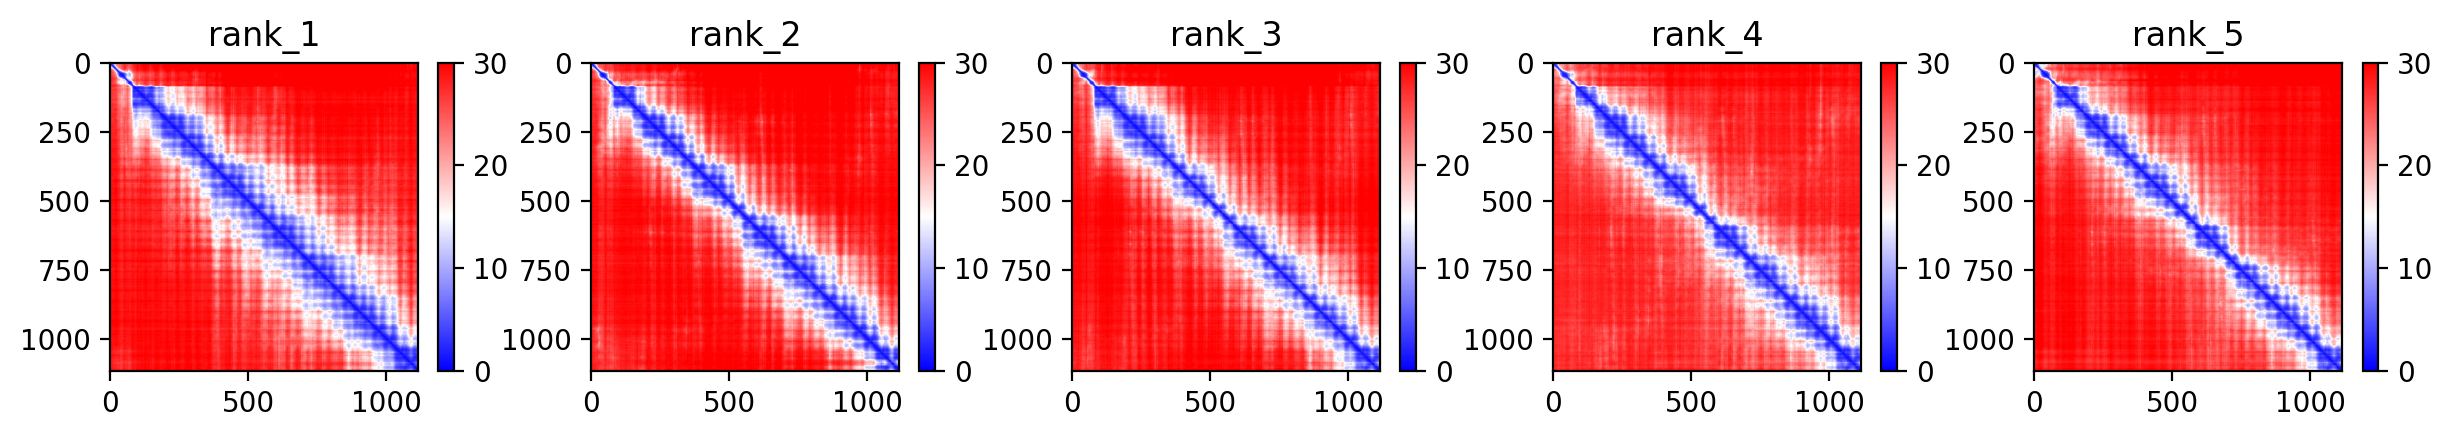

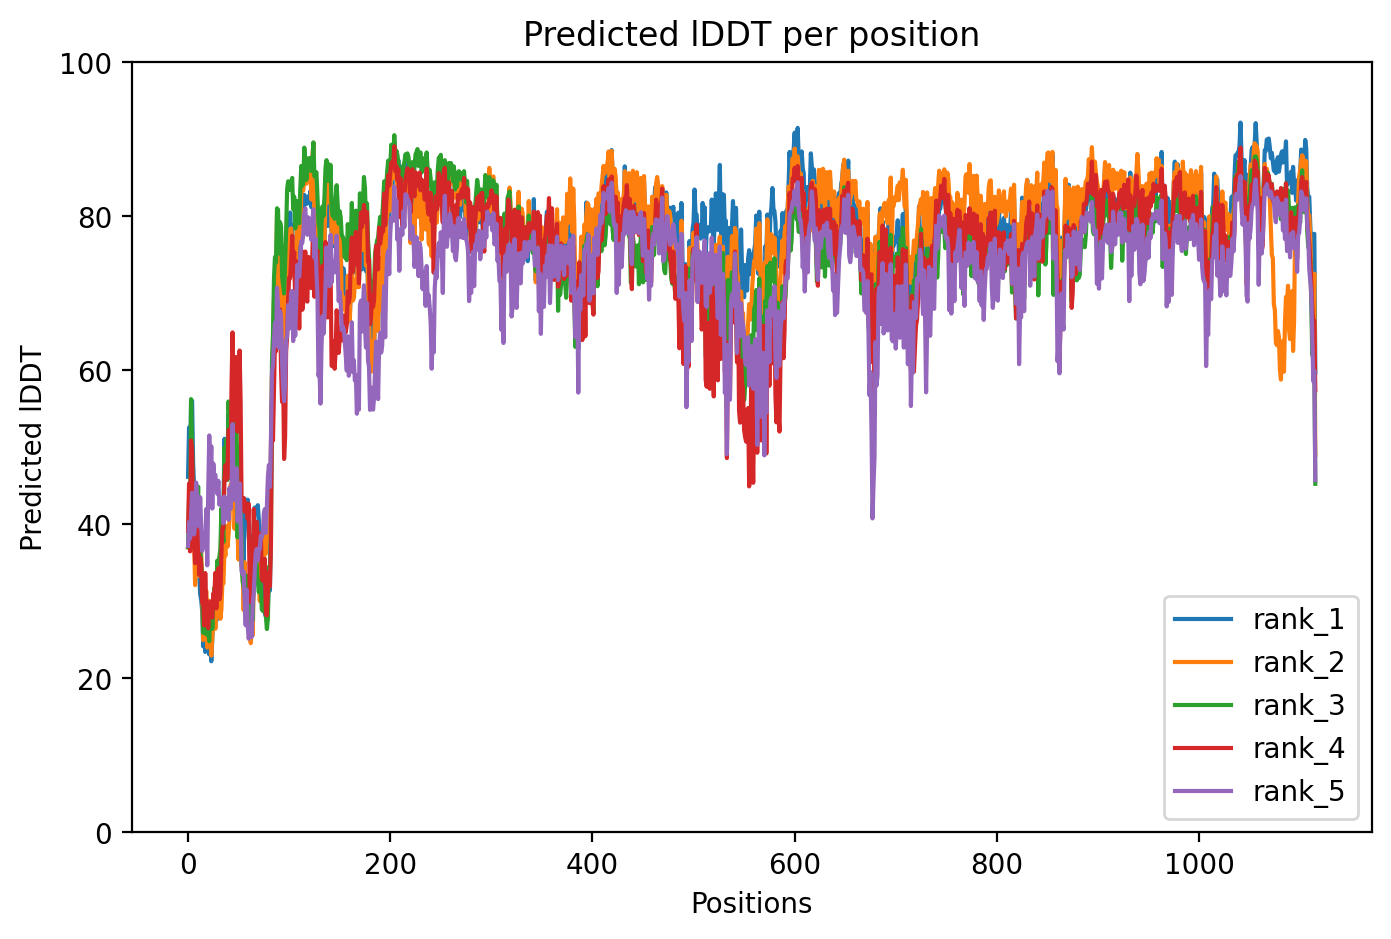

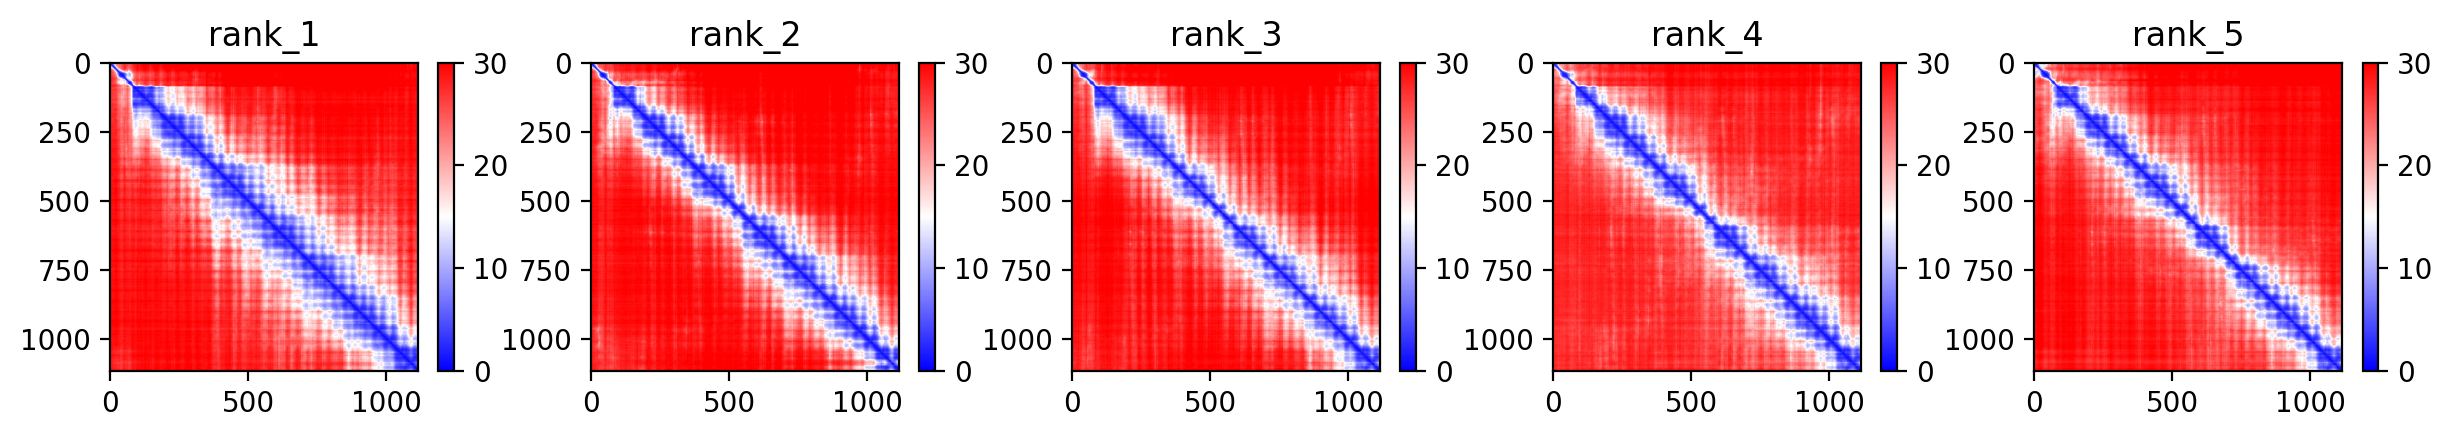


a)

b)

c)

d)

**Figure 2S.Structure prediction of MRR of CagY protein calculated by ColabFold/AlphaFold2.** a) The five structure prediction models ordered by IDDT predicted Rank. b) Plot of coverture of templates in the database of Alphafold to our sequence. c) Heatmaps of the five predicted structures. d) Plot of the IDDT values for the five MRR-predicted models shows values higger than 60.
