# Supplementary material for: A Proposal for a Consolidated Structural Model of the CagY Protein of Helicobacter pylori
Source: Preprints.org preprint supplement (doi:10.20944/preprints202310.1146.v1), 2023-10-18
Supplement: Supplementary file 3 [file Figure 3S.docx]

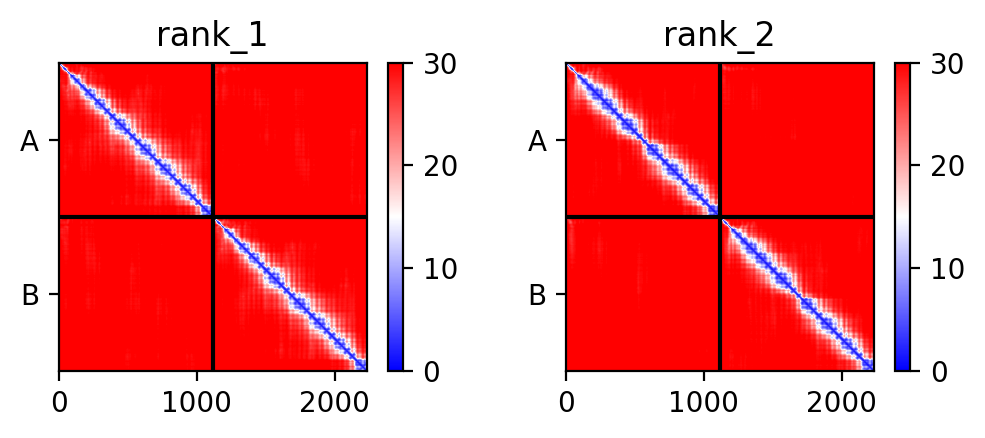

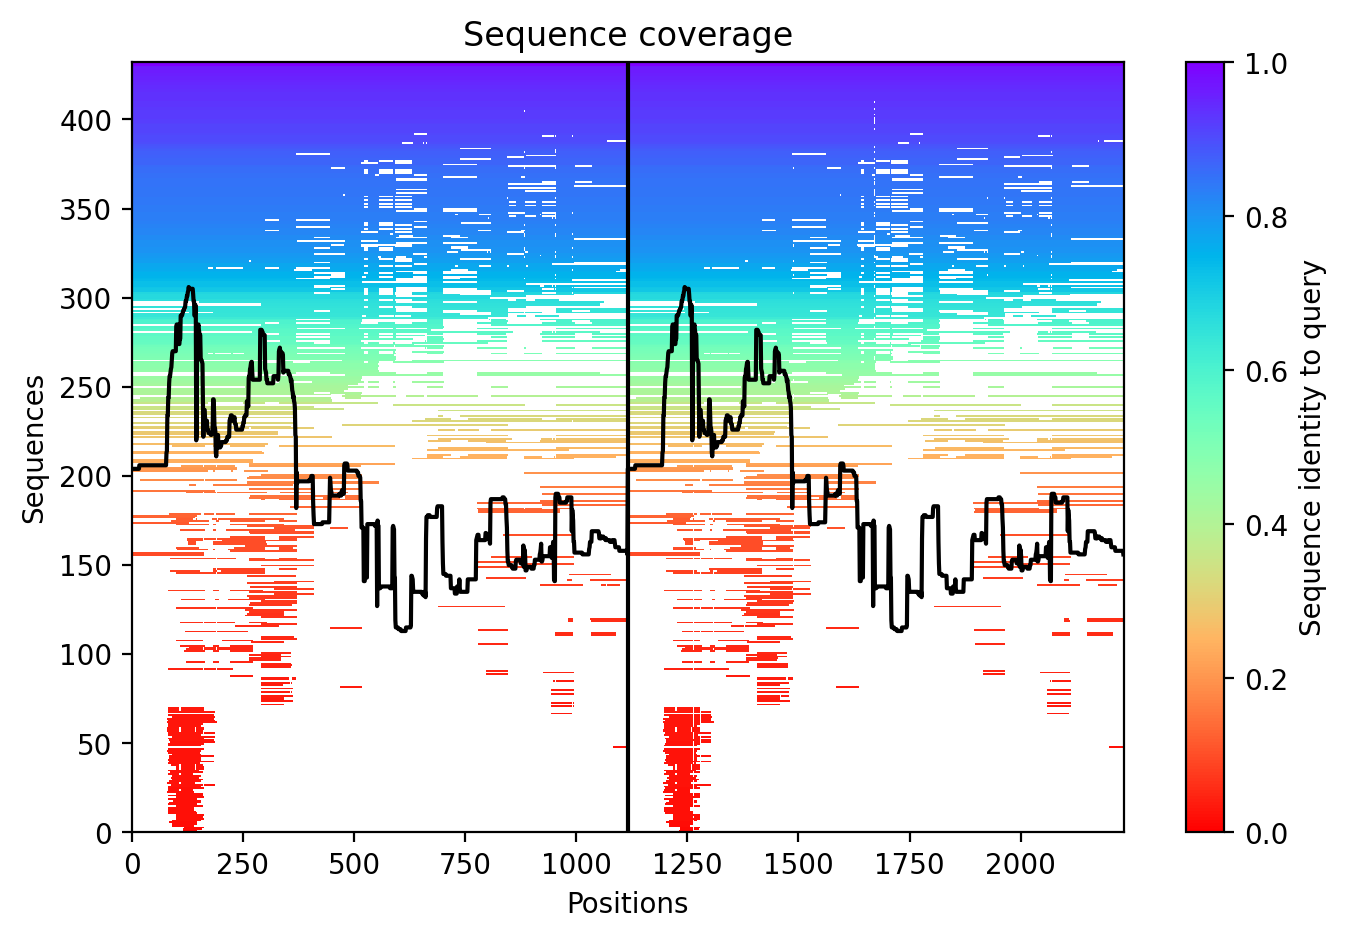

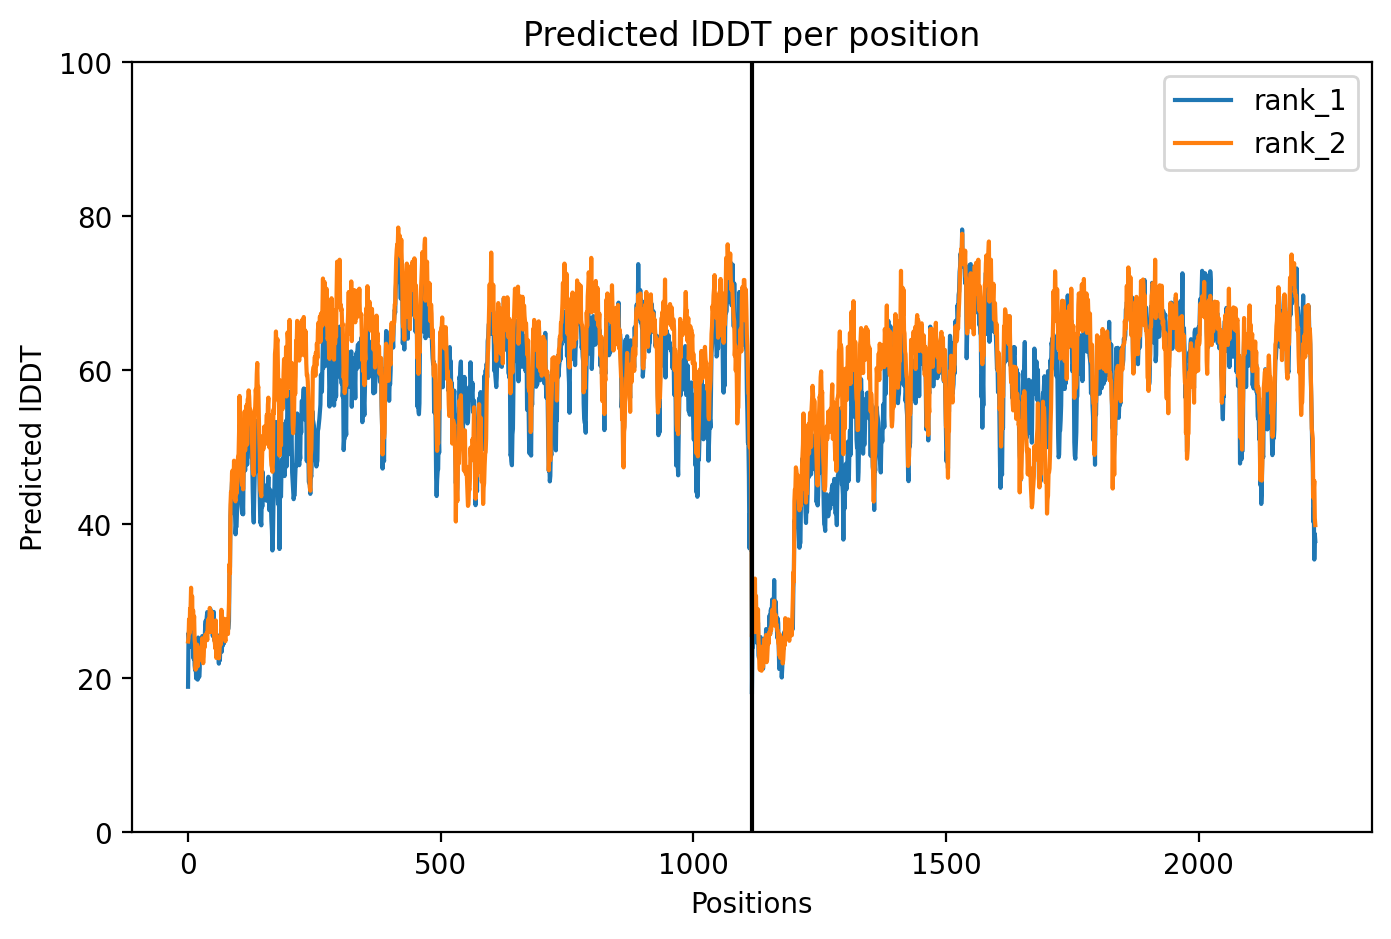

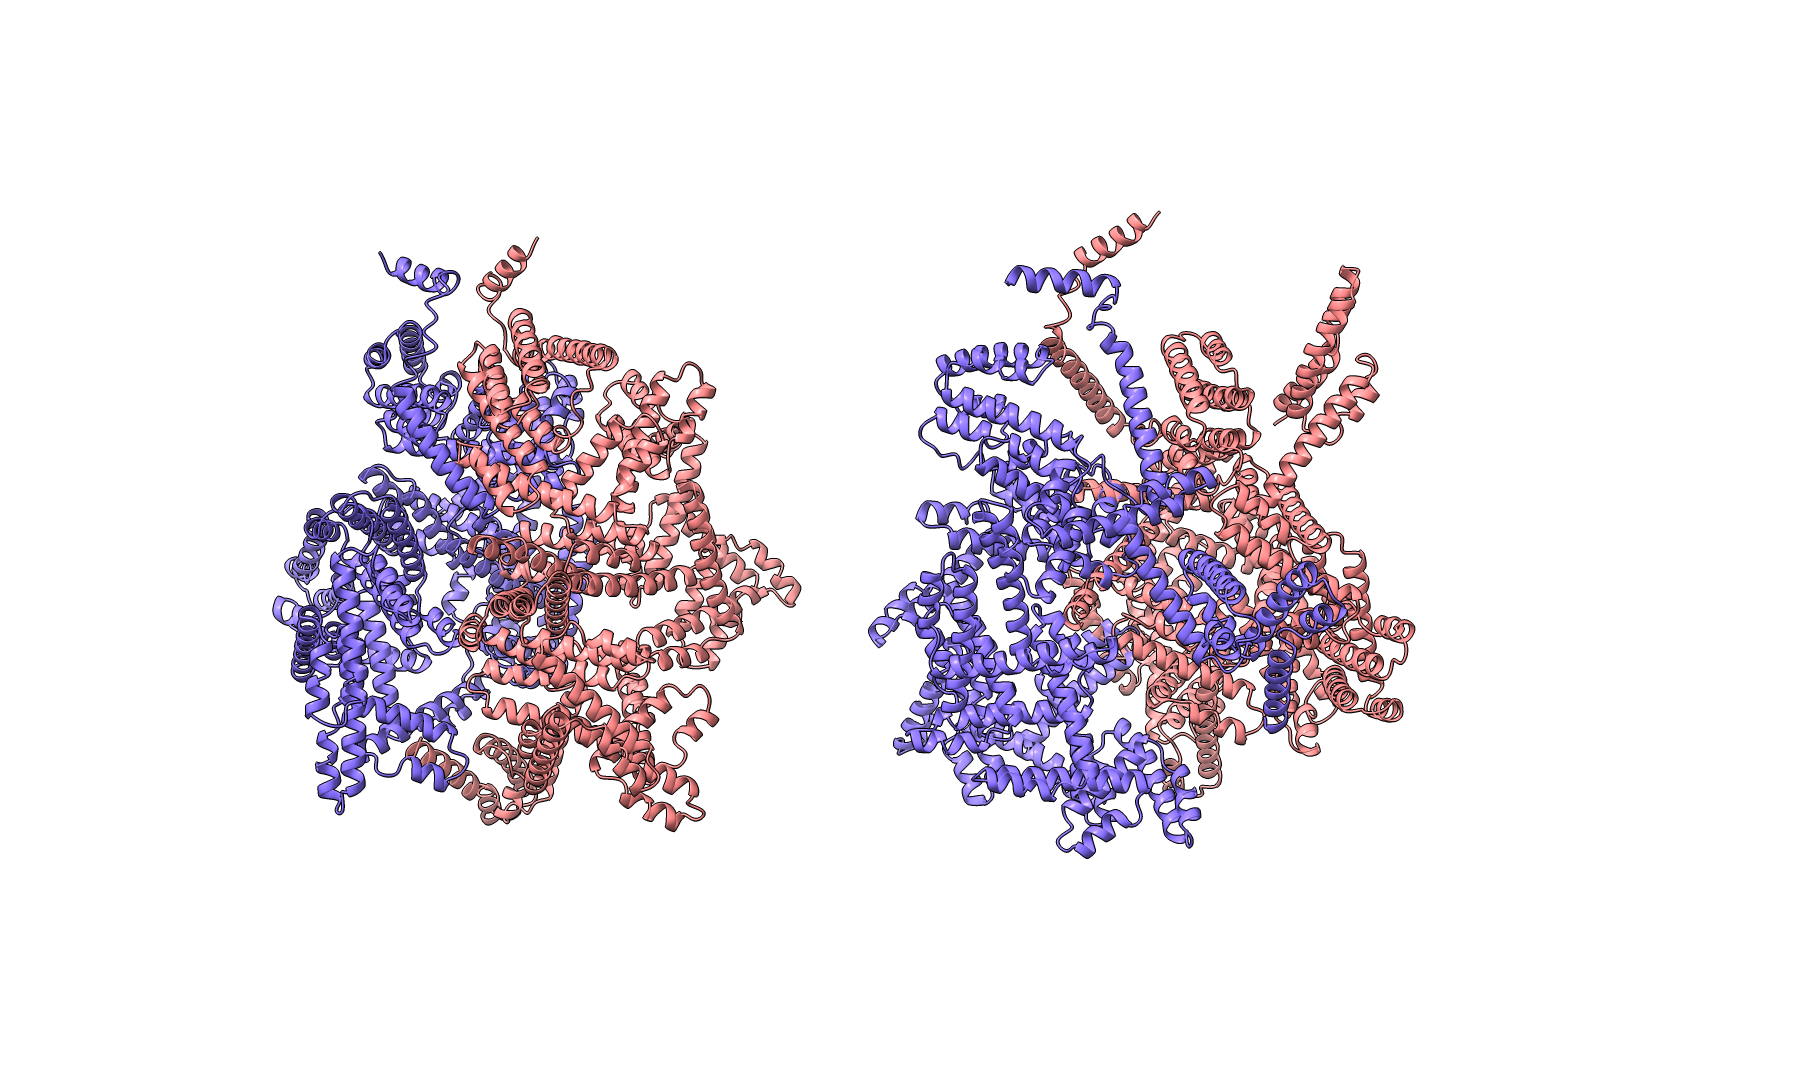


a)

b)

c)

d)

**Figure 3S. Structure prediction of the CagY dimer calculated by Colabfold/Alphafold2.** a) Two models of the structure prediction ordered by their IDDT predicted Rank. b) Plot of coverage of templates in the AlphaFold database. c) Heatmaps for comparing the two predicted structures d) Ploto of the predicted IDDT for the two dimer predictions showing values higher than 60.
