# Supplementary material for: A Proposal for a Consolidated Structural Model of the CagY Protein of Helicobacter pylori
Source: Preprints.org preprint supplement (doi:10.20944/preprints202310.1146.v1), 2023-10-18
Supplement: Supplementary file 6 [file Figure 6S.docx]

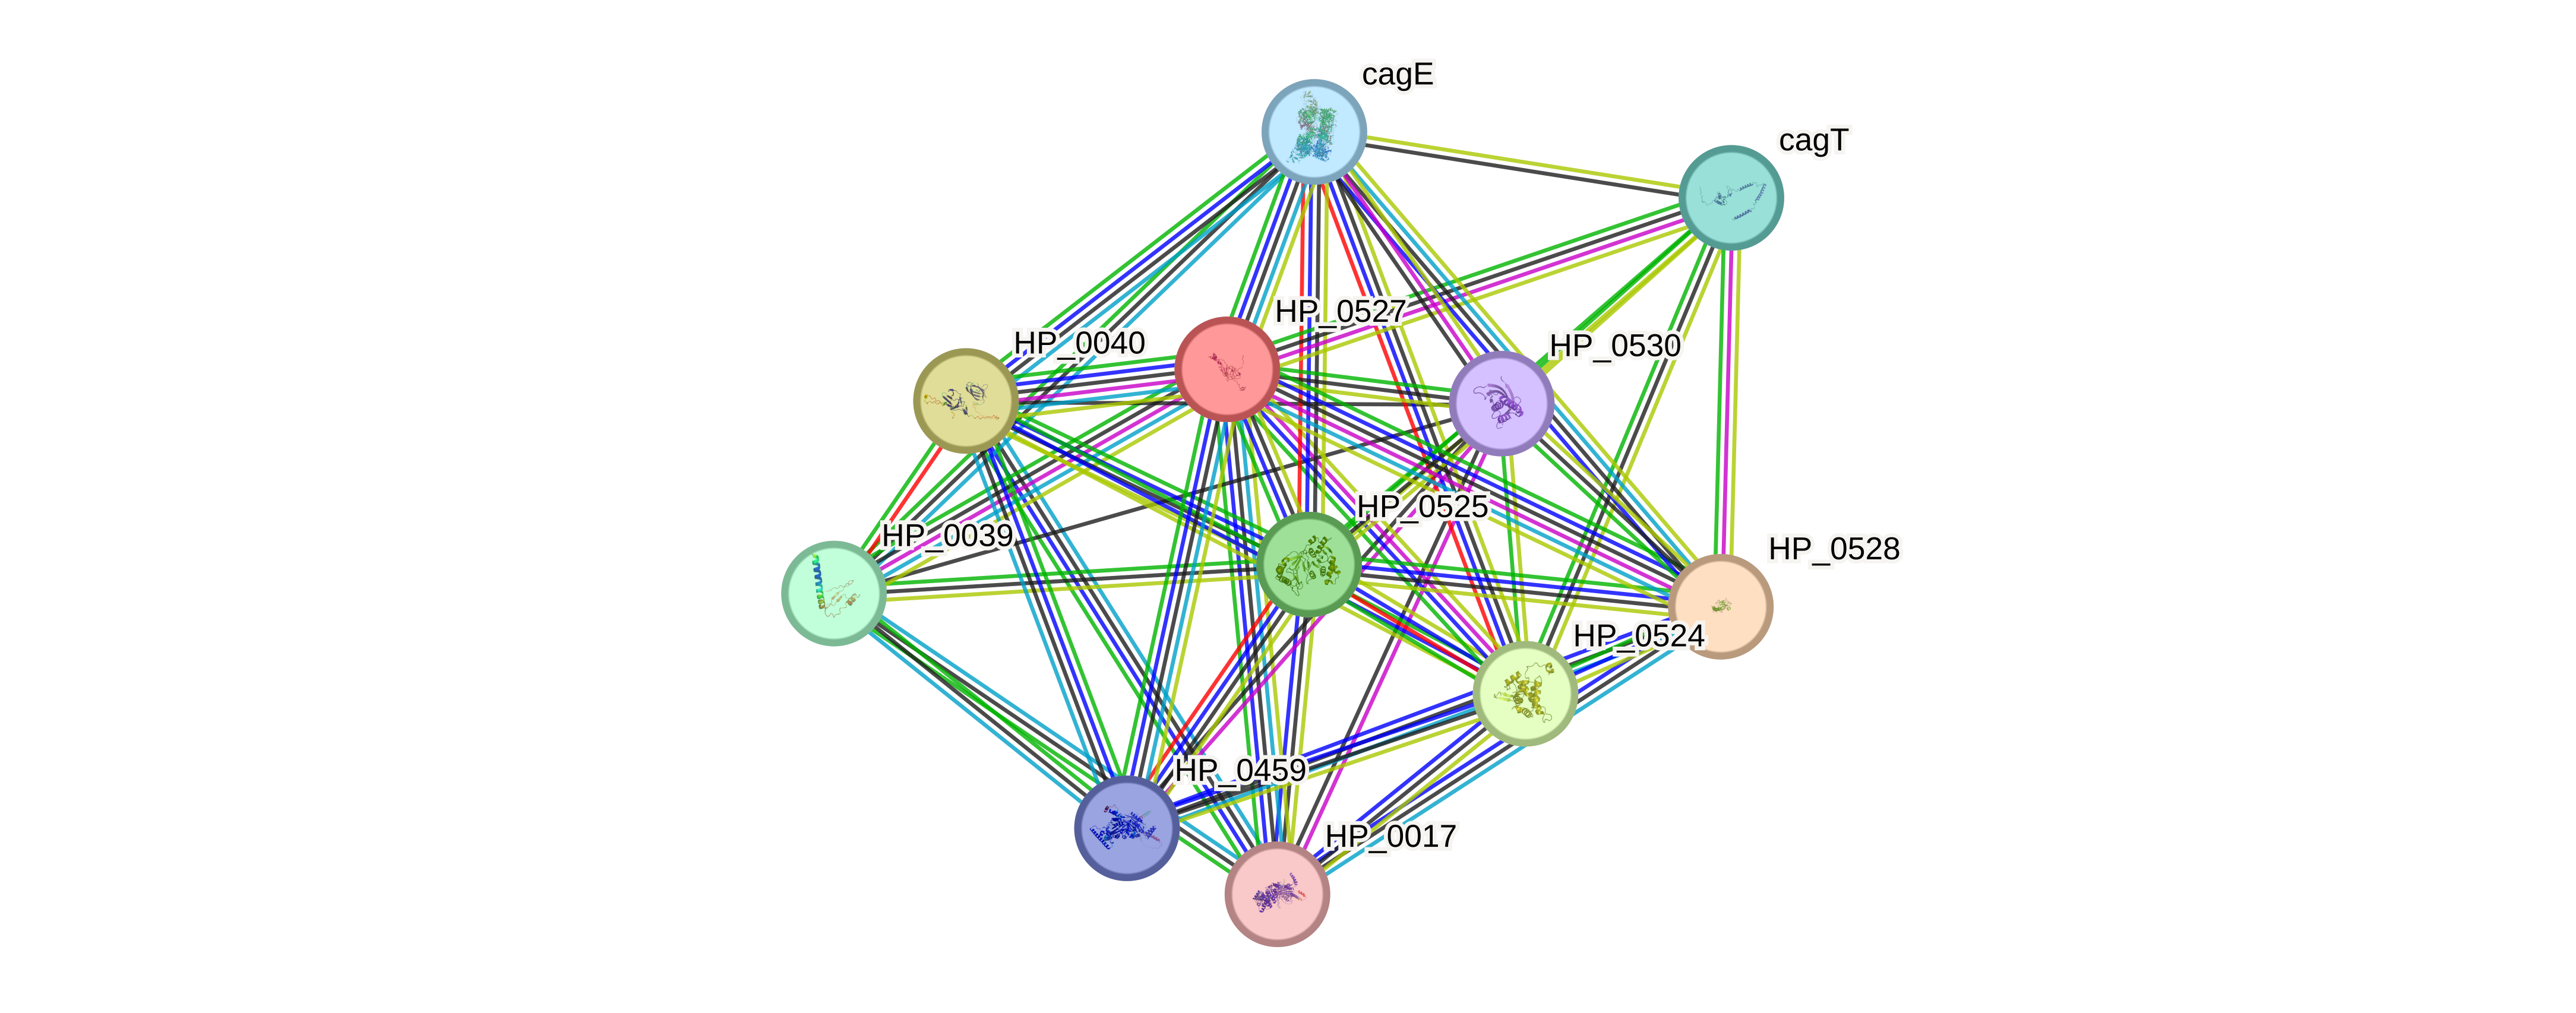


**Figure 6S. STRING network of CagY protein.** The STRING interaction analysis of the CagY (Cag7) protein of *Helicobacter pylori,* showin the interaction with other genes of the T4SS.
